# Supplementary material for: DNA Methylation Levels in Cervical Scrapes for Predicting the Risk of Cervical Lesions and Cancer
Source: Research Square preprint supplement (doi:10.21203/rs.3.rs-6182081/v1), 2025-04-30
Supplement: Supplementary file 1 [file da67d0f385f4ab8f8a2948f2.docx]

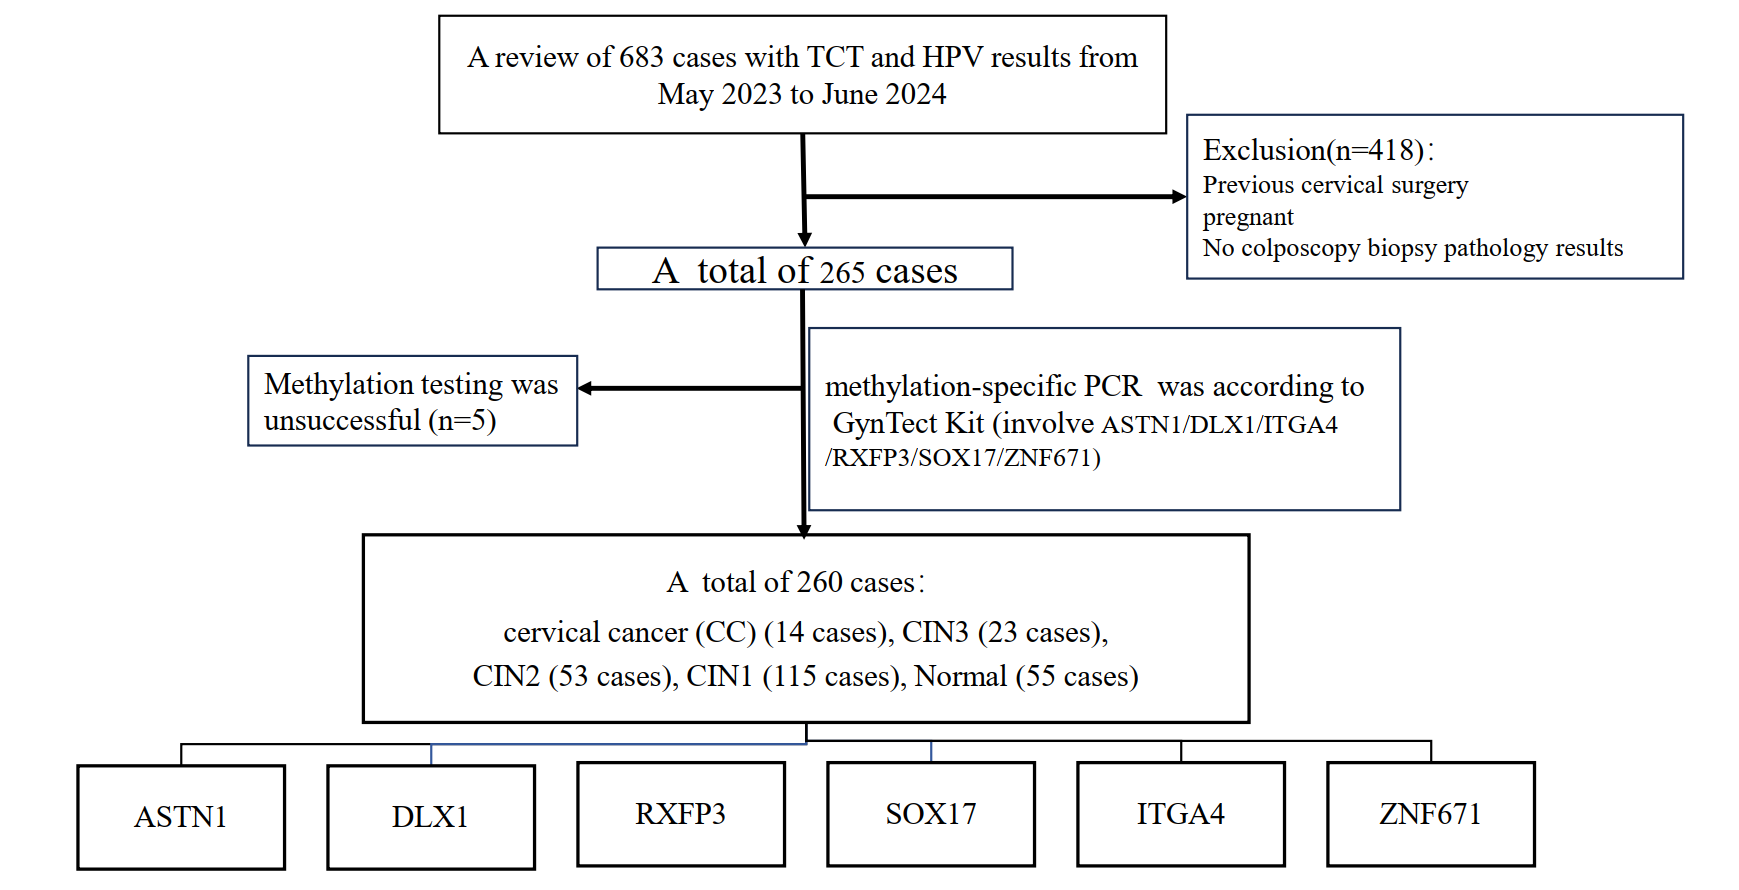


SupplementalS1：the enrollment flowchart of included patients

**Supplemental Table S2**

AUCs of 6 DNA Methylation screening methods between CIN3- and Cancer (N=90)

| Methods | Sensitivity (%) | Specificity (%) | AUC |
| --- | --- | --- | --- |
| ASTN1 | 85.71 | 67.11 | 0.833 |
| DLX1 | 100.00 | 63.16 | 0.822 |
| RXFP3 | 100.00 | 55.26 | 0.811 |
| SOX17 | 100.00 | 63.07 | 0.853 |
| ZNF671 | 78.57 | 81.58 | 0.854 |
| ITGA4 | 43.33 | 97.65 | 0.804 |
